# Supplementary material
Source: PubMed Central journal article supplement (PMC5442632)
Supplement: IAI.00091-17_zii999092044s1.pdf [file IAI.00091-17_zii999092044s1.pdf]

**Supplementary Table S1. Genes that are upregulated during iron toxicity.**

| <b>Locus tag</b>                             | <b>Spy Number<sup>a</sup></b> | <b>Fold-change<sup>b</sup></b> | <b>Annotation<sup>c</sup></b>                   |
|----------------------------------------------|-------------------------------|--------------------------------|-------------------------------------------------|
| <b><u>Iron efflux</u></b>                    |                               |                                |                                                 |
| <i>pmtA</i>                                  | SpyM3_1093                    | 17.6                           | Iron efflux pump                                |
| <b><u>Arginine and serine catabolism</u></b> |                               |                                |                                                 |
| <i>arcD</i>                                  | SpyM3_1193                    | 3.0                            | Arginine/ornithine antiporter                   |
| <i>arcB</i>                                  | SpyM3_1194                    | 3.48                           | Ornithine carbamoyl transferase                 |
| <i>SpyM3_1195</i>                            | SpyM3_1195                    | 3.42                           | N-acetyl transferase                            |
| <i>argR</i>                                  | SpyM3_1198                    | 2.95                           | Arginine repressor                              |
| <i>sdhA</i>                                  | SpyM3_1841                    | 2.01                           | L-serine dehydratase $\alpha$ subunit           |
| <i>sdhB</i>                                  | SpyM3_1842                    | 2.10                           | L-serine dehydratase $\beta$ subunit            |
| <b><u>Carbohydrate metabolism</u></b>        |                               |                                |                                                 |
| <i>SpyM3_0576</i>                            | SpyM3_0576                    | 2.34                           | Uncharacterized membrane protein                |
| <i>apbA</i>                                  | SpyM3_0577                    | 2.30                           | Dehydropantoate reductase                       |
| <i>fruR</i>                                  | SpyM3_0578                    | 2.41                           | DeoR family transcription regulator             |
| <i>fruK</i>                                  | SpyM3_0579                    | 2.25                           | Phosphofructokinase                             |
| <i>fruA</i>                                  | SpyM3_0580                    | 2.0                            | Fructose PTS subunit IIC                        |
| <i>manX</i>                                  | SpyM3_0741                    | 3.34                           | Mannose/Fructose PTS subunit IIA                |
| <i>agaB</i>                                  | SpyM3_0742                    | 3.30                           | Mannose/Fructose PTS subunit IIB                |
| <i>manY</i>                                  | SpyM3_0743                    | 3.30                           | Mannose/Fructose PTS subunit IIC                |
| <i>manZ</i>                                  | SpyM3_0744                    | 3.51                           | Mannose/Fructose PTS subunit IID                |
| <i>manL</i>                                  | SpyM3_1511                    | 2.01                           | Mannose-specific PTS component IIAB             |
| <i>pmi/manA</i>                              | SpyM3_1566                    | 2.00                           | Mannose-6-phosphate isomerase                   |
| <b><u>Enzymes</u></b>                        |                               |                                |                                                 |
| <i>adh1</i>                                  | SpyM3_0037                    | 4.51                           | Zn-free alcohol dehydrogenase                   |
| <i>pfl</i>                                   | SpyM3_1596                    | 10.5                           | Pyruvate formate lyase                          |
| <i>nrdD</i>                                  | SpyM3_1794                    | 2.31                           | Anaerobic ribonucleoside triphosphate reductase |
| <b><u>Hypothetical proteins</u></b>          |                               |                                |                                                 |
| <i>M3_0112</i>                               | SpyM3_0112                    | 3.00                           | Hypothetical protein                            |

|                |            |      |                      |
|----------------|------------|------|----------------------|
| <i>M3_0746</i> | SpyM3_0746 | 2.10 | Hypothetical protein |
| <i>M3_0747</i> | SpyM3_0747 | 2.20 | Hypothetical protein |
| <i>M3_1763</i> | SpyM3_1763 | 2.43 | Hypothetical protein |
| <i>M3_1092</i> | SpyM3_1092 | 3.20 | Hypothetical protein |

**Supplementary Table S2. Genes that are downregulated during iron toxicity**

| <b>Locus tag</b>                                  | <b>Spy Number<sup>a</sup></b> | <b>Fold-change<sup>b</sup></b> | <b>Annotation<sup>c</sup></b>                                  |
|---------------------------------------------------|-------------------------------|--------------------------------|----------------------------------------------------------------|
| <b><u>Fatty acid biosynthesis</u></b>             |                               |                                |                                                                |
| <i>accA</i>                                       | SpyM3_1517                    | 3.10                           | Acetyl-CoA carboxylase $\alpha$ subunit                        |
| <i>accB</i>                                       | SpyM3_1521                    | 3.50                           | Acetyl-CoA carboxylase biotin carboxyl carrier protein subunit |
| <i>accC</i>                                       | SpyM3_1519                    | 3.20                           | Acetyl-CoA carboxylase biotin carboxylase subunit              |
| <i>accD</i>                                       | SpyM3_1518                    | 3.12                           | Acetyl-CoA carboxylase $\beta$ subunit                         |
| <i>fabZ</i>                                       | SpyM3_1520                    | 3.38                           | $\beta$ -hydroxy myristoyl ACP dehydratase                     |
| <i>fabF</i>                                       | SpyM3_1522                    | 3.33                           | 3-oxoacyl ACP synthase III                                     |
| <i>fabG</i>                                       | SpyM3_1523                    | 4.17                           | $\beta$ -ketoacyl ACP reductase                                |
| <i>fabD</i>                                       | SpyM3_1524                    | 4.33                           | ACP S-malonyl transferase                                      |
| <i>fabK</i>                                       | SpyM3_1525                    | 4.84                           | Enoyl ACP reductase II                                         |
| <i>acpP</i>                                       | SpyM3_1526                    |                                | Acyl carrier protein P                                         |
| <i>fabH</i>                                       | SpyM3_1527                    | 3.40                           | 3-oxoacyl ACP synthase III                                     |
| <i>fabT</i>                                       | SpyM3_1528                    | 3.40                           | MarR-family regulator                                          |
| <i>phaB</i>                                       | SpyM3_1529                    | 3.60                           | Enoyl-CoA hydratase                                            |
| <b><u>Iron-sulfur cluster assembly</u></b>        |                               |                                |                                                                |
| <i>sufC</i>                                       | SpyM3_0208                    | 1.90                           | Iron-sulfur cluster assembly ATPase                            |
| <i>sufD</i>                                       | SpyM3_0209                    | 2.10                           | Iron-sulfur cluster assembly protein                           |
| <i>sufS</i>                                       | SpyM3_0210                    | 2.10                           | Iron-sulfur cluster assembly – cysteine desulphurase           |
| <i>sufB</i>                                       | SpyM3_0212                    | 2.20                           | Iron-sulfur cluster assembly protein                           |
| <i>IscU</i>                                       | SpyM3_0211                    | 2.20                           | Iron-sulfur cluster assembly scaffold protein                  |
| <b><u>Amino acid metabolism and transport</u></b> |                               |                                |                                                                |
| <i>braB</i>                                       | SpyM3_0236                    | 3.80                           | Branched amino acid transport system – carrier protein         |
| <i>sstT</i>                                       | SpyM3_0237                    | 2.90                           | Serine/Threonine transporter SstT                              |

|                               |            |      |                                                       |
|-------------------------------|------------|------|-------------------------------------------------------|
| <i>glnP</i>                   | SpyM3_0997 | 3.75 | Glutamine binding domain                              |
| <i>glnQ</i>                   | SpyM3_0998 | 3.20 | Glutamine binding ATPase                              |
| <i>glnA</i>                   | SpyM3_1621 | 2.35 | Glutamine synthetase                                  |
| <i>glnR</i>                   | SpyM3_1622 | 2.20 | Glutamine repressor                                   |
| <br>                          |            |      |                                                       |
| <i>atmA</i>                   | SpyM3_0232 | 2.60 | Methionine ABC transporter – solute binding protein   |
| <i>atmE</i>                   | SpyM3_0235 | 2.0  | Methionine ABC transporter permease                   |
| <br>                          |            |      |                                                       |
| <b><u>Metal transport</u></b> |            |      |                                                       |
| <i>mtsA</i>                   | SpyM3_0318 | 3.65 | Manganese transporter – substrate - binding protein   |
| <i>mtsB</i>                   | SpyM3_0319 | 3.3  | Manganese transporter – ATP binding subunit           |
| <i>mtsC</i>                   | SpyM3_0320 | 2.96 | Manganese transporter – permease                      |
| <i>adcB</i>                   | SpyM3_0071 | 2.0  | Zinc transporter - permease                           |
| <br>                          |            |      |                                                       |
| <b><u>DNA metabolism</u></b>  |            |      |                                                       |
| <i>nrdF.2</i>                 | SpyM3_0301 | 2.4  | Ribonucleoside diphosphate Reductase                  |
| <i>nrdI.2</i>                 | SpyM3_0302 | 2.2  | Ribonucleotide reductase                              |
| <i>nrdE.2</i>                 | SpyM3_0303 | 2.1  | Ribonucleotide reductase                              |
| <br>                          |            |      |                                                       |
| <b><u>Miscellaneous</u></b>   |            |      |                                                       |
| <i>opuABC</i>                 | SpyM3_0144 | 2.22 | Glycine/betaine ABC transporter – permease            |
| <i>opuAA</i>                  | SpyM3_0143 | 2.36 | Glycine/betaine ABC transporter – ATP binding subunit |
| <i>sodM</i>                   | SpyM3_1071 | 2.7  | Superoxide dismutase                                  |
| <i>csrA</i>                   | SpyM3_0739 | 3.23 | Methionine sulfoxide reductase B                      |
| <i>cfa</i>                    | SpyM3_0905 | 2.5  | cAMP factor                                           |
| <i>spl</i>                    | SpyM3_0583 | 2.2  | Signal Peptidase I                                    |
| <i>mscL</i>                   | SpyM3_0517 | 2.8  | Putative mechano-sensitive channel                    |
| <br>                          |            |      |                                                       |
| <b><u>Hypothetical</u></b>    |            |      |                                                       |
| <i>M3_0629</i>                | SpyM3_0629 | 4.6  | Hypothetical protein                                  |
| <i>M3_0630</i>                | SpyM3_0630 | 3.2  | Hypothetical protein                                  |
| <i>M3_0631</i>                | SpyM3_0631 | 2.2  | Hypothetical protein                                  |
| <i>M3_1665</i>                | SpyM3_1665 | 2.2  | Hypothetical protein                                  |

|                |            |      |                      |
|----------------|------------|------|----------------------|
| <i>M3_1666</i> | SpyM3_1666 | 2.74 | Hypothetical protein |
| <i>M3_1667</i> | SpyM3_1667 | 2.36 | Hypothetical protein |
| <i>M3_0101</i> | SpyM3_0101 | 2.1  | Hypothetical protein |
| <i>M3_0103</i> | SpyM3_0103 | 2.23 | Hypothetical protein |
| <i>M3_0272</i> | SpyM3_0272 | 2.5  | Hypothetical protein |
| <i>M3_0775</i> | SpyM3_0775 | 2.32 | Hypothetical protein |
| <i>M3_1022</i> | SpyM3_1022 | 2.2  | Hypothetical protein |
| <i>M3_0813</i> | SpyM3_0813 | 2.17 | Hypothetical protein |
| <i>M3_1362</i> | SpyM3_1362 | 2.17 | Hypothetical protein |
| <i>M3_0740</i> | SpyM3_0740 | 2.1  | Hypothetical protein |
| <i>M3_0164</i> | SpyM3_0164 | 2.0  | Hypothetical protein |
| <i>M3_0077</i> | SpyM3_0077 | 4.1  | Hypothetical protein |

<sup>a</sup> Spy number according to the reference genome MGAS315

<sup>b</sup> Comparison between WT GAS grown in the presence and absence of 1 mM FeSO<sub>4</sub>

<sup>c</sup> Annotation according to the reference genome MGAS315

**Supplementary Table S3.** Bacterial strains and plasmids used in this study.

| Strain or plasmid                               | Description                                                                                | Reference                            |
|-------------------------------------------------|--------------------------------------------------------------------------------------------|--------------------------------------|
| <b>Strains</b>                                  |                                                                                            |                                      |
| MGAS10870                                       | Invasive isolate, serotype M3                                                              | (Beres <i>et al.</i> , 2010)         |
| MGAS10870 $\Delta$ <i>pmtA</i>                  | MGAS10870 $\Delta$ <i>pmtA</i> :: <i>aad9</i>                                              | This study                           |
| MGAS10870: <i>pDC</i>                           | MGAS10870 with empty vector, Cm <sup>+</sup>                                               | (Shelburne III <i>et al.</i> , 2011) |
| $\Delta$ <i>pmtA</i> : <i>pDC</i>               | MGAS10870 $\Delta$ <i>pmtA</i> :: <i>aad9</i> , empty vector, Cm <sup>+</sup>              | This study                           |
| $\Delta$ <i>pmtA</i> : <i>pDC</i> - <i>pmtA</i> | MGAS10870 $\Delta$ <i>pmtA</i> :: <i>aad9</i> , <i>pmtA</i> , Cm <sup>+</sup>              | This study                           |
| $\Delta$ <i>perR</i>                            | MGAS10870 $\Delta$ <i>perR</i> :: <i>aad9</i>                                              | (Makthal <i>et al.</i> , 2013)       |
| $\Delta$ <i>perR</i> : <i>pDC</i>               | MGAS10870 $\Delta$ <i>perR</i> :: <i>aad9</i> , empty vector, Cm <sup>+</sup>              |                                      |
| $\Delta$ <i>perR</i> - <i>pDC</i> : <i>perR</i> | MGAS10870 $\Delta$ <i>perR</i> :: <i>aad9</i> , <i>perR</i> <sup>+</sup> , Cm <sup>+</sup> | (Makthal <i>et al.</i> , 2013)       |
| <b>Plasmids</b>                                 |                                                                                            |                                      |
|                                                 | Low-copy number plasmid capable of replication in GAS and <i>Escherichia coli</i> ,        |                                      |

|                 |                                                                                     |                                 |
|-----------------|-------------------------------------------------------------------------------------|---------------------------------|
| <i>pDC123</i>   | Cm <sup>+</sup>                                                                     | (Li <i>et al.</i> ,<br>1997)    |
| <i>pDC-pmtA</i> | <i>pDC123</i> with <i>pmtA</i> gene fused with its native promoter, Cm <sup>+</sup> | This study                      |
| <i>pDC:perR</i> | <i>pDC123</i> with entire <i>perR</i> gene plus promoter, Cm <sup>+</sup>           |                                 |
| <i>pSL60-1</i>  | Vector containing <i>aad9</i> gene encoding spectinomycin resistance                | (Lukomski <i>et al.</i> , 2000) |

**Supplementary Table S4. Primers and probes used in this study**

| Primer             | Sequence (5'-3')                                              | Target                                                                  |
|--------------------|---------------------------------------------------------------|-------------------------------------------------------------------------|
| <i>pmtA-A</i>      | AATGGAGAAATTGTGACAG                                           | 5' primer for 5' region of <i>pmtA</i>                                  |
| <i>pmtA-B</i>      | GTTATAGTTATTATAACATGTATTTTTTAGTTCCCT<br>CGCAATTA AAAAGT       | 3' primer for 5' region of <i>pmtA</i> with <i>spc</i> sequence overlap |
| <i>pmtA-C</i>      | CTATTTAAATAACAGATTA AAAAAATTATAATTTAG<br>AAACTTGCTTGAAA ACTTG | 5' primer for 5' region of <i>pmtA</i> with <i>spc</i> sequence overlap |
| <i>pmtA-D</i>      | TTGTGCATTTTGATCAAGC                                           | 3' primer for 3' region of <i>pmtA</i>                                  |
| <i>pmtA-E</i>      | TCTAGAAAATCTTGTTGC                                            | 5' primer for 5' region of <i>pmtA</i>                                  |
| <i>pmtA-F</i>      | TCAAAGCTTAGACGATTTTCGTG                                       | 3' primer for 3' region of <i>pmtA</i>                                  |
| <i>pmtA-G</i>      | TACTATCTTCAGATAACACG                                          | 5' primer for 5' region of <i>pmtA</i>                                  |
| <i>pmtA-H</i>      | TACTACTTAGACTTTGTCAG                                          | 3' primer for 3' region of <i>pmtA</i>                                  |
| <i>pmtA-spcF</i>   | ACTTTTAATTGCGAGGGA ACTAAAAATACATGTT<br>ATAATAACTATAAC         | 5' primer for <i>spc</i> along with <i>pmtA</i> overlap sequence        |
| <i>pmtA-spcR</i>   | CAAGTTTTCAAGCAAGTTTCTAAATTATAATTTTTT<br>AATCTGTTATTTAAATAG    | 3' primer for <i>spc</i> along with <i>pmtA</i> overlap sequence        |
| <i>pDC-pmtA-F</i>  | TTCAAAGCTGATAAGTCAGGCACCATCTC                                 | 5' <i>pmtA</i> primer for complementation                               |
| <i>pDC-pmtA-R</i>  | TTAGAGATGGTGCCTGACTTATCAGCTTTTGAAG                            | 3' <i>pmtAB</i> primer for full length <i>pmtA</i> complementation      |
| <i>pmtA</i> qRT 5' | AGCTATCGGTGCTGGAATTATC                                        | 5' primer for <i>pmtA</i> qRT-PCR                                       |
| <i>pmtA</i> qRT 3' | GGCCATTTCTTCAAGCGTATTG                                        | 3' primer for <i>pmtA</i> qRT-PCR                                       |
| <i>pmtA</i> probe  | AAATAAGCAGAGCACCTCCAGCC                                       | Probe for <i>pmtA</i> qRT-PCR                                           |
| <i>tufA</i> qRT 5' | CAACTCGTCACTATGCGCACAT                                        | 5' primer for <i>tufA</i> qRT-PCR                                       |
| <i>tufA</i> qRT 3' | GAGCGGCACCAGTGATCAT                                           | 3' primer for <i>tufA</i> qRT-PCR                                       |
| <i>tufA</i> probe  | CTCCAGGACACGCGGACTACGT TAAAAA                                 | Probe for <i>tufA</i> qRT-PCR                                           |

Supplementary figure S1

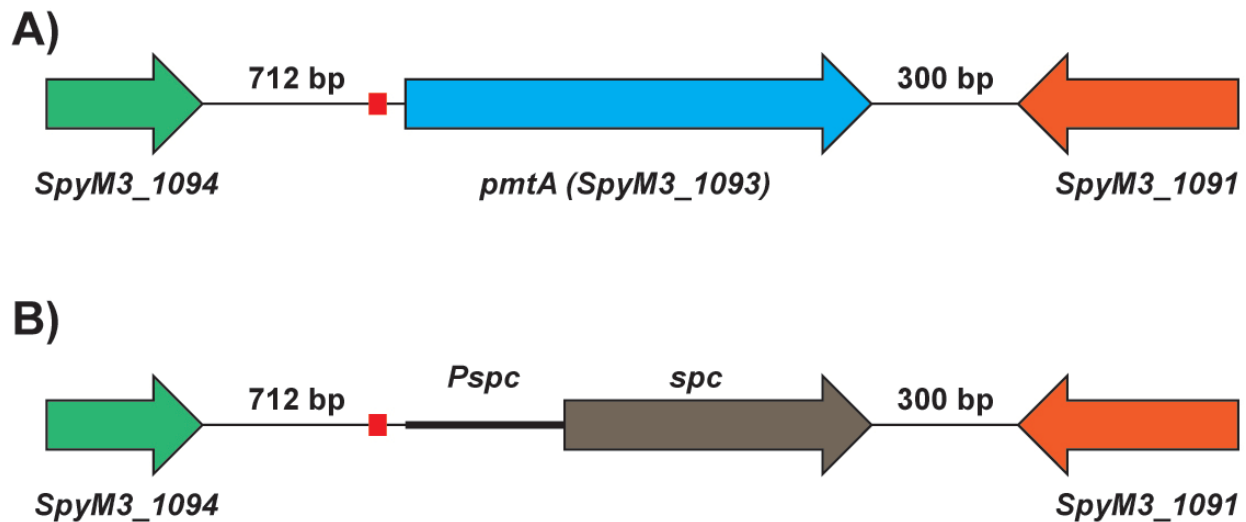

**Supplementary figure S1. Schematic diagram showing the genetic context of *pmtA* in GAS genome (A) and insertional inactivation of *pmtA* by spectinomycin cassette (B).**

The coding region of *pmtA* and genes flanking on either side of *pmtA* are shown in block arrows, whereas the intergenic region that separates *pmtA* from its adjacent genes are marked as thin lines. Spy identification number of each gene is indicated below. The numbers above the line indicate the number of bases that separate *pmtA* and its flanking coding regions. The PerR binding site, *per* box, located upstream of *pmtA* gene is marked as red box. The spectinomycin resistance marker along with its native promoter used for the insertional inactivation of *pmtA* is shown in grey (bottom panel).



## Supplementary figure S2

```

FrvA_Lmo      -----MKEWMKQNWQFITTGISGILIVIGCLVGSNVGDFWTAVIF
PfeT_Bsu     MNEQVIVQRDPHEPLKTDKREKNWA-QHAELIAALVSGALILAGWLLSG--YQVLSIILF
S. pyogenes  -----MTIRQWMADHLHLMETLACLVLIIIGLAF LHS-FPQVASAIF
S. agalactiae MSKQ-----T-----GA---HTHEEKGNVPVILFFTGLALFFISLFLGN--MLLVKNILF
S. mutans    MSKE-----D-----QGKKIPARDNLLTNMEVKLFFLGM LLFIVGLGFNF--TPSLQNSLN
S. pneumoniae MNENTVLYQT-TDQKGSNSL FHKWA-QHGELIAAGISGILILIGWFLKD--ETMWSIPLF
S. suis      -----MTLVTNLKQHSII TTALCLVFIIVGILLQ T-GQGWA P I L F
S. dysgalactiae -----MTIKAWI IDHLHLMETLACLVLIIIGLAF L GP-LPHVASAIF
E. faecalis  -----MCYSEF-----EKEGFMMERL-KSMILLP P I L C F V F I V L G I I F E Q V - S S S V Y P I F Y
                                     . . . . .
                                     : : : . . . :

FrvA_Lmo     LSAFVIGGF EQAKEGIQATIKTKK-----LNVELLMILAATGAS IIGYWFE GAILIFIF
PfeT_Bsu     LLAFVIGGF FAKAKEGIEETLESKT-----LNVELLMIFAAIGSALIGYWAEGAILIFIF
S. pyogenes  ITAFVIGGYASAKTGILD LVKNKH-----LSVDILMILAAIGAGIIGYWLEGALLIFIF
S. agalactiae SLAAILAGYHI IEGEGFD TYRDTKNNRKFSPNIHLLMTLAAVGSALMG SFEE SALLILIF
S. mutans    ILALLISGYHI IWEGIKDTIEKSKKAKHFVPNTHILMTMAALGAVLLGETTEAALLIFIF
S. pneumoniae ILAFVIGGF FAKAKEGIEETISSKT-----LNVELLMIFAAIGS A IIGYWAEGAILIFIF
S. suis      ISAFVIGGYQSAKEGLAELIFDKH-----LSVDVLMILAAIGSGIIGYWMEGALLIFIF
S. dysgalactiae ILAFVIGGYESAKAGLMDLVQHNH-----LSVDVLMILAAIGAGIIGYWLEGALLIFIF
E. faecalis  LLAILFGGYAQTK EGLVELFTHRT-----FNVDLLMALAAIGACLI G DYREGAILTFIF
          * : : * : * : . . : * : * * : : * * . * : * : * *

FrvA_Lmo     SVSGALETYTTNKS KREITKLMAFQPERAFRLLPNGDLEEVAAKELQLDDMV FVRPGE SV
PfeT_Bsu     SLSGALETYTMNKSSRDLTSLMQLEPEEATLMV-NGETKRVPVSDLQAGDMIVIKPGERV
S. pyogenes  SLSNTLEEMAMEKSKDAISALMSLTPDTARQYQEDGHILEVETRSLVGDRLQVRKGEAV
S. agalactiae AAAHFLEDYAQGKSQREITKLLNLPTEARLITDDGSIQTVSVEQLKVGDRVQV L NGAQI
S. mutans    AGAHFLEEYVEGRSQREITKLLNLPTEARRFR TDGSIEMISVQDLEIGDRVQI L NGDQV
S. pneumoniae SLSGALETYTSNKS KDLTALMSIAPDEATLIEEDGTTIQIAASSLTPGDRILIKAGERI
S. suis      SLSSTLEELAMEKSKNAIAALMNMT PPTARKVEENGDI TVLD TAAIRIGDLLQVRKGD TV
S. dysgalactiae SLSNTLEEMAMEKSKDAISALMSLTPDTARRYQEDGSI VDVETKLLTIGDRLQVRKGEAV
E. faecalis  CLSGALETYTMNKSRKELTSLMKLQPKTAQRYLPNGEKETIPVEDLAIGDRIFVAKGQSL
          . : * * . : * : : * : * * : * : . : . * : : * :

FrvA_Lmo     PIDGVIVRGSTTLNEAAINGESVPATKTVGADVFGGTVNVSSAITVKVTQTFDNTIFSKI
PfeT_Bsu     AADGIIESGSTSLDESALTGESMPVEKNTGDTVFTGTVNRNGSLTVRVTKANEDSLFRKI
S. pyogenes  PIDGQLLSPFGQFDESMVTGEPITVDKAEGQDLIGGTINQGQ TIDMLVTIENDDTLFAKI
S. agalactiae PTDGVVIEGSTAVDESSINGESIPKEKNSGDPVFGSTMNGSGTIVVEVTKDSSETVFAKI
S. mutans    PTDGKVIKQTS IDESTISGESIPCEKTVGDEVFGSTINDSGTIVVEVTKDSSETVFAKI
S. pneumoniae AADGVIMSGRTSVDESAL TGESVPQEKQGEDVFAGTVNLNGSLTVEVTKHNEETL FHKI
S. suis      PLDATLISQSI FDES MITGEPLPAEKAAGAAVIGGTINQGPTVTVQVTAEKGDALFDKI
S. dysgalactiae PIDGELLSTFGQFDESMVTGEPITVDKTKGQELIGGTINQGQ TIDMLVTIENDDTLFAKI
E. faecalis  PIDGF LQNARAAIDES AISGESIPVEKIFGEEVFGGTLNVGDPFDLEVSKNND E TIFSKI
          * . : . : * : : * * : : . * : * . . : * : : : * *

FrvA_Lmo     IRLVESAQSEPSKTARFIERFEDAYVKAVLLFVLVMMFLPHFALGWSWNETFYRAMVLLT
PfeT_Bsu     IKLVESAQNSVSPAQAFIERFENAYVKGVLI AVALLLFVPHFALGWSWSETFYRAMVFMV
S. pyogenes  INLVESAQEKKSKTATFIESLEDGYVKFVLVLI PAFILF SHFVLSWTWLA AFYRGMILLT
S. agalactiae VQLVNQSQENQSEIASKIKRFEPKYVTLVLA V FPLIIVLGGALFFQLTWAESFYRGLVFLI
S. mutans    LQLVEASQTNLSMSAQHIRRFEPVYVNVVLLVFIALLICGPFVWDWTWNSTFSTSLTFLV
S. pneumoniae IKLVESAQESVSPSQAFIEKFEGAYVKGVLI TVAILMFLPHFVLGWSMSETFYRAMVFMV
S. suis      VQMVENAEKSKTATFIENMEDTYVKVVLVVVPLF I LFAHFALGWDWLTAFYRGMILLT
S. dysgalactiae INLVESAQEKKSKTATFIESLEDGYVKFVLVLI PAFILF SHFVLSWTWLA AFYRGMILLT
E. faecalis  IQLIEEAQNIPTKTASFIERIENTYVKCVLVA VPLMMLVCYFIFSWSLQESFYRGMVLLV
          : : : : * : . : * . * * . * . : : : : * . : : :

```

FrvA\_Lmo VA**SPC**ALVASVTPATLAAISNGARHGILFKGGVHLENLRGVKAVAF**DKTGT**LTNGTPELT  
PfeT\_Bsu VA**SPC**ALVASIMPAALSLISNGARNGMLVKGSVFLEQLGVSQMIAF**DKTGT**VTKGQPAVE  
*S. pyogenes* VA**SPC**ALIASSTPASLAAISRAARKGLIIKGGDIVDNMGDIKAVVM**DKTGT**LTQ GKPSVV  
*S. agalactiae* AA**SPC**ALAAASAVPATLSGISNLAKQGVLFKGGSFLSNLAEVKALAF**DKTGT**LTQ GKPEVVT  
*S. mutans* SA**SPC**ALAVSVIPATLAGISNLARQGVLFKGGTFLESELSDLKVVAF**DKTGT**LTQ GKPEVV  
*S. pneumoniae* VA**SPC**ALVASIMPAALSLISNGARNGMLVKGSVFLEKLGSTMIAF**DKTGT**LTSGKPAVE  
*S. suis* IA**SPC**ALVASSSPATLSAISRAARKGMIKGGDIADNIANLEAIVF**DKTGT**LTIGKPEVV  
*S. dysgalactiae* VA**SPC**ALIASSTPASLAAISRAARKGLIIKGGDIVDNMGDIKAVVM**DKTGT**LTQ GKPSVV  
*E. faecalis* VA**SPC**ALVASATPATLAAALSNAVKNGILIKGGIHLEQLAELKAVAF**DKTGT**LTQ GKPIVT  
\*\*\*\*\* . \* \*\* : \* : \* . . : \* : . \* \* . . : : . : \* \* \* \* : \* \* \* :

FrvA\_Lmo DRLFAENVDK--QQVINVVGAMERQSLHPLAAAITQDLEAEITEKLTETIEVTDVAGWGVQ  
PfeT\_Bsu TIRIAEGFSE--AEVLEAVYAIETQSSHPLAQAITAYAESRGNVQSGYISIEETSGFGVM  
*S. pyogenes* NAHYLEDELL--V--NRLVKGAEAASTHPISKALLEYTEAV--EALNFDQLEEIAGKGFQ  
*S. agalactiae* DYLFIDGLEDRQDELVAVLNMEKKSNNHPLATAIVNRFEAETTA--LNLEVENIVGVGLV  
*S. mutans* RVCLEPTI-MSEEKLTAVIFAMESQSNHPLARAI VNYFSDGKSLDKLTISATNHLGGQLT  
*S. pneumoniae* KVVLEAKQDE--STFYQALYQIESQSNHPLAKAISDMAKEHHHTERAHVITIEETSGQFVE  
*S. suis* GATYLGDEKF--I--KQVVQAVEKQSSHP IAQALMITYTADS--SAIALQSLDEVTGKGLV  
*S. dysgalactiae* NAHYLEDELL--V--NRLVKGAEAASTHPISKALLEYTEKL--EPLIFDHLLEEISGKGFQ  
*E. faecalis* DTMFLQDEEL--AR--LMLVAMESKTTTHPLAQAI VQAFDLSL PAPHLDLDIQEVTGSGLL  
: \* : \*\* : \* : : \* \* . : \* \* .

FrvA\_Lmo AIYQEEENQVVGKAGFVKGEEA---AAFNGAFERLAGEGKTIVYVAKDGV IQAMFALKDIT  
PfeT\_Bsu AEVSGAKWKVKGAGF IGEEMA---AQFMKQTASDV IQSGHTIVFVKKDDQIAGC IALKDQ  
*S. pyogenes* GLYQGEWRIGKKSFILEMVPDL--SAFEETIQVEESQGKTLIFVSRDNQLVAYYALLDD  
*S. agalactiae* TTIADTTFRIGKPSFEQV-----PTIIEKQTTKLASEGKTVVYFAENERVIGLVALMDV  
*S. mutans* AIYNHLTVRIGKQPSFAQA-----AERWLHNKEAEEANGRTVVVFSVNEKVI GFIAIQDR  
*S. pneumoniae* AQLNEDTWRIGKKDFAGKASM---DRDIEENGDVLSKGYTVVYVQKNQEVGCLGLKDQ  
*S. suis* ASYQGD SWKIGKAGFVVDLSVPLSADLLAQIDEAESTGKTLVYVSQNNVLA IAFMVEDS  
*S. dysgalactiae* GFYQGEWRIGKKTFILEKVQDL--SAFEETIQVEENQGKTLIFVSRDHQLIAYYALLDD  
*E. faecalis* TTYQQSTWVKVGHAYDPETMDV--APEVKEKIALLEE QGKTVIYLSRDDQLTAILGLLDV  
: : \* \* . \* \* : : . : : \* :

FrvA\_Lmo CRPEAIRTIKALQAKGIKTIMVTGDNEQTGAAIQ AELGMDYVVS GCLPEKKVDVLKELSV  
PfeT\_Bsu IRPEAKEVMEELNRLGIKTAMLTDGHEDTAQAI AKEAGMTTVVAECLPDQKVNEIKRLKE  
*S. pyogenes* IKLESKRAIEALHAMGIKTVMLTGDQERTANYVAQKLG IDEVVANCMPODKVAKLAELKT  
*S. agalactiae* PNEEAMNAIHYFKSQNIETMTITGDAKLTGEAVGR LVGVDQVYANVLPPEKSAIVDQLKR  
*S. mutans* PQTAVEAINYFKTAGVKTIMITGDQAQLTGQAIGSELG IDEVVTNILPEQKAKIISKYQD  
*S. pneumoniae* IRPEAKMIQELNDLGIQTVMLTGDQOKTAE AIAEEAGIQTVVAECLPDEKVHEVNQLKK  
*S. suis* LKPESKQLIAQLKEMGVTPILLTGDQEK TARYVASQV GIDRVIANCLPTEKASVIQELQ T  
*S. dysgalactiae* IKIESKRAIKSLHAMGIKTVMLTGDQERTANYVAQKLG IDEVVANCMPODKVAKLAELKT  
*E. faecalis* PKANAQEVIA YFEEHGVQTSMITGDHPGTAKAIAQQIGITNYHAGCTPEEKTEL IAKKRA  
. : . : : . . : : \* \* \* \* . \* : \* : : \* \* \* \* :

FrvA\_Lmo TYGSVAMVGDGINDAPALAHASVGIAMGEGTDI AMETADVVL MKNLDLEKIPYAYNLSERL  
PfeT\_Bsu EFGTIAMVGDGINDAPALKAADVGIAMGGTDVALE TADMVLMKNLDLKKLVNMCRLSRKM  
*S. pyogenes* KYGFVAMVGDGINDAPALAQADVS YAIGSGTDIAMESADSVIMD-DLTRIPFSIQLSRKM  
*S. agalactiae* EVGMTGMVGDGINDAPALVNADIGVAMGDGTDIA IDVADVVMKNLDSKLG YAHVRSKRL  
*S. mutans* QYGLTAMLGDGVNDAPALVSADIGIAMGDGTDVAI ETADVLMRNDLTKLVKAHLSKRL  
*S. pneumoniae* QGDSIIMVGDGINDAPALATADVGVAMGGTDVALE TADLILMKNLNNLTKMIRLSRKM  
*S. suis* EFTSVGMVGDGINDAPALAQANVSYAMGSGTDI AMESADIVLME-DLTRIPYSIRLSKRM  
*S. dysgalactiae* KYGFVAMVGDGINDAPALAQADVS YAIGSGTDIAMESADSVIMD-DLTRIPFSIQLSRKM  
*E. faecalis* EVSVNAMVGDGVNDAPALAAA SIGIAMGKGTDIAMDVADLV LKNDLSKLVYSHKLSLKL  
\* : \* \* \* : \* \* \* \* \* \* . : . \* \* \* \* \* : \* \* : : \* \* : : \* \* \* \* :

FrvA\_Lmo HWITWQNICFAIAVILVLTITANVFQ LINL PFGVVG**HEGST**ILVILNGLRLLRSNRKK---  
PfeT\_Bsu NRIIKQNI VFLAVICLLICANFLQAMEL PFGVIG**HEGST**ILVILNGLRLLK-----  
*S. pyogenes* KTI IKQNI VFLAVSITLLILANVFQVNLPLGVVG**HEGST**ILVILNGLRLLSFK-----  
*S. agalactiae* NKIVQONI IFSMLVVATLII LNFLGIANIAF SVLI**HEGST**LVVIFNGLRLLVNTK-----

```

S. mutans          KNIIRQNILFALLVIMMLISFTFFGHLSVVASVALHEGSTLIVLLNSLRLLMNKN-----
S. pneumoniae    NRIIKQNIIFSLTVICLLICANFLQVLDLDPFGVIGHEGSTILVILNGLRLLRAS-----
S. suis          RGIIKQNIIFALSVALLIISNLFQSINLPLGVVGHHEGSTILVILNGLRLLYFK-----
S. dysgalactiae  KTIIKQNIIVFALSVITLLILANVFQVNLPLGVVGHHEGSTILVILNGLRLLSFK-----
E. faecalis      RKIIKQNIIFSVSVICLLVLSNFIQILNLPIGVVGHHEGSTILVILNGLRLLRGVDAVPNL
                  . * *** *:: *: *: ..: .: .* *****::*::*.****

Frva_Lmo          -----
PfeT_Bsu          -----
S. pyogenes      -----
S. agalactiae    -----
S. mutans        -----
S. pneumoniae    -----
S. suis          -----
S. dysgalactiae  -----
E. faecalis      RAAKETKQTIDIDA

```

**Supplementary figure S2. Amino acid sequence alignment of PmtA and its orthologs from the genus *Streptococcus*.** The highly conserved S-P-C motif from the predicted TM-4 helix and H-E-G-S-T motif from the predicted TM-6 helix are highlighted and colored red.

Supplementary figure S3

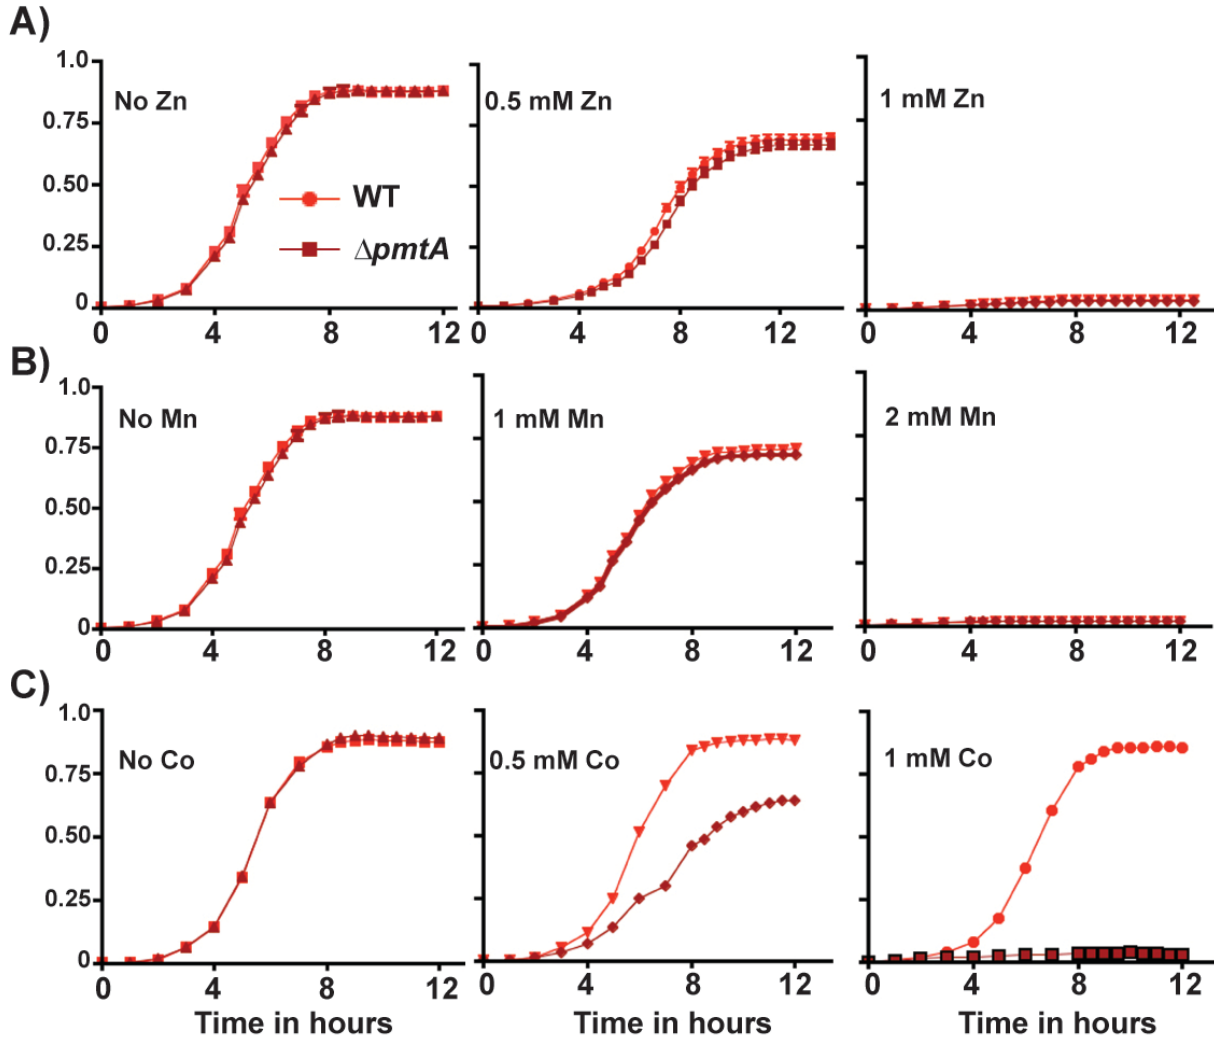

**Supplementary figure S3.** Growth kinetics of the WT GAS and the isogenic  $\Delta pmtA$  mutant strains in THY medium supplemented with increasing concentrations of indicated metals. Three biological replicates were grown and the graph represents mean  $\pm$  standard deviation.
